# Supplementary material for: Evaluating Tidal Marsh Sustainability in the Face of Sea-Level Rise: A Hybrid Modeling Approach Applied to San Francisco Bay
Source: PLOS journal article supplement (doi:10.1371/journal.pone.0027388), 2011-11-16

Figure S1. Data sources for mapped starting elevations within San Francisco Bay study area.

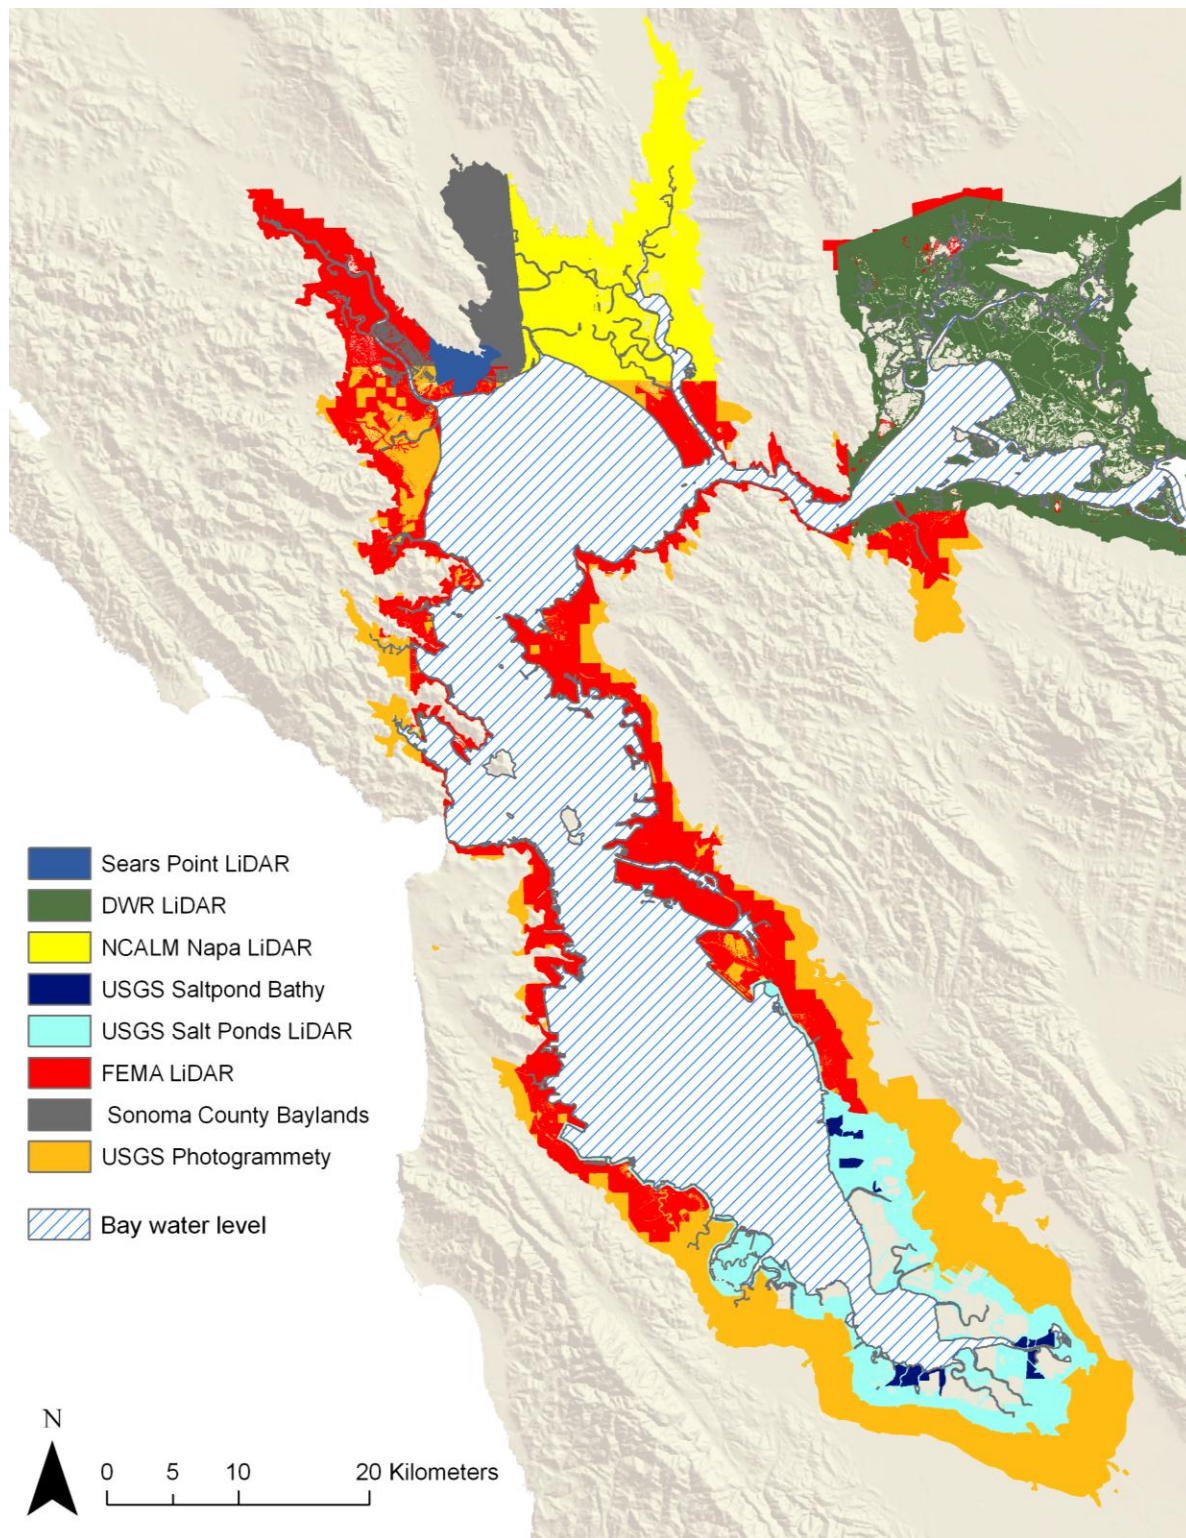

Supplement: S1 (10.1371/journal.pone.0027388.s001) [file journal.pone.0027388.s001]
